# Supplementary material for: On Some Origins of Tautomeric Preferences in Neutral Creatinine in Vacuo: Search for Analogies and Differences in Cyclic Azoles and Azines
Source: MDPI journal article supplement (doi:10.3390/sym16010098), 2024-01-12
Supplement: s1 [file s1]

## On Some Origins of Tautomeric Preferences in Neutral Creatinine in Vacuo: Search for Analogies and Differences in Cyclic Azoles and Azines

Ewa Daniela Raczyńska

Department of Chemistry, Warsaw University of Life Sciences (SGGW)  
ul. Nowoursynowska 159c, 02-776 Warszawa, Poland  
[ewa\\_raczyńska@sggw.edu.pl](mailto:ewa_raczyńska@sggw.edu.pl); Tel.: +48-22-59-37623

| Contents                                                                                                  | Page |
|-----------------------------------------------------------------------------------------------------------|------|
| Structures, HOMEDs, and $\Delta$ Gs for tautomers-rotamers of <b>2AIm</b> and <b>2A1MIm</b> (Fig. S1)     | S2   |
| Structures, HOMEDs, and $\Delta$ Gs for tautomers-rotamers of <b>4AIm</b> (Fig. S2)                       | S3   |
| Structures, HOMEDs, and $\Delta$ Gs for tautomers-rotamers of <b>2OIm</b> (Fig. S3)                       | S3   |
| Structures, HOMEDs, and $\Delta$ Gs for tautomers-rotamers of <b>4OIm</b> and <b>4O1MIm</b> (Fig. S4)     | S4   |
| Structures, HOMEDs, and $\Delta$ Gs for tautomers-rotamers of <b>Crea</b> (Fig. S5)                       | S5   |
| Linear trends between HOMED5s for isomers of <b>AIm</b> and <b>OIm</b> (Fig. S6)                          | S6   |
| Linear trends between HOMED6s for isomers of <b>AIm</b> and <b>OIm</b> (Fig. S7)                          | S7   |
| Structures, HOMEDs, and $\Delta$ Gs for selected isomers of isocytosine (Fig. S8)                         | S8   |
| Plots between $\Delta$ Gs of <b>AIm</b> and <b>OIm</b> and between their HOMEDs and $\Delta$ Gs (Fig. S9) | S9   |
| Thermochemical parameters for isomers of <b>AIm</b> and <b>OIm</b> (Table S1)                             | S10  |
| Thermochemical parameters for isomers of <b>A1MIm</b> and <b>O1MIm</b> (Table S2)                         | S11  |
| Thermochemical parameters for <b>Crea</b> -isomers (Table S3)                                             | S11  |
| Comparison of DFT results with the literature data for <b>Crea</b> -isomers (Table S4)                    | S12  |
| Comparison of DFT, G2 and G2(MP2) results for selected <b>4OIm</b> -isomers (Table S5)                    | S12  |

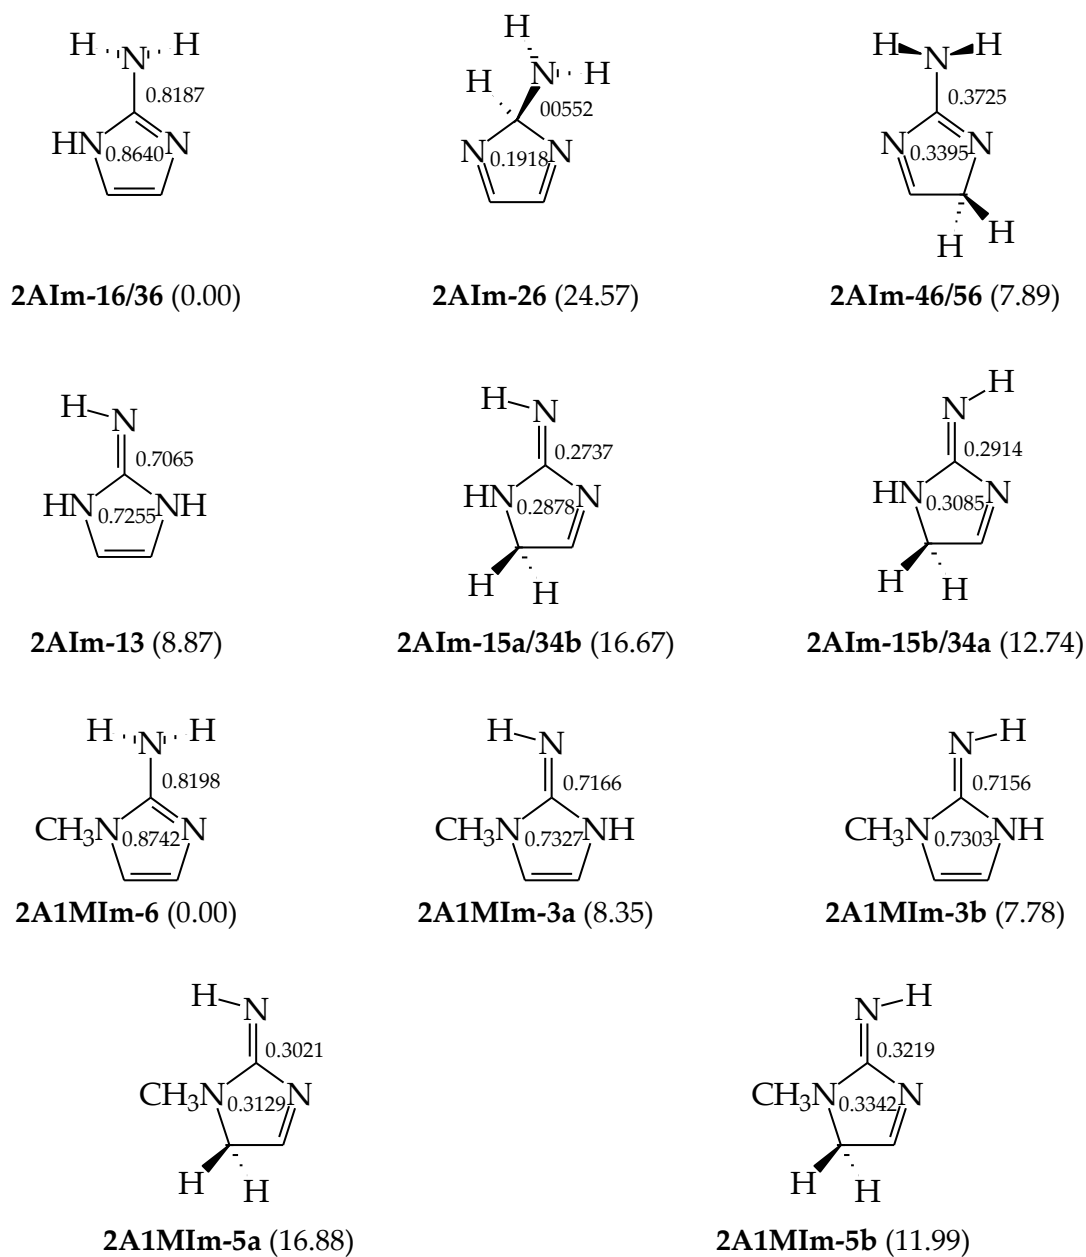

**Figure S1.** Structures for tautomers-rotamers of 2-amino-imidazole (**2AIm**) and its 1-methyl derivative (**2A1MIm**), their HOMEDs and  $\Delta G$ s estimated at the DFT(B3LYP)/6-311+G(d,p) level. HOMED5s included in the ring. HOMED6s for isomers of **2AIm** and **2A1MIm** placed near formula.  $\Delta G$ s (in kcal mol<sup>-1</sup>) given in parentheses after isomer abbreviation.

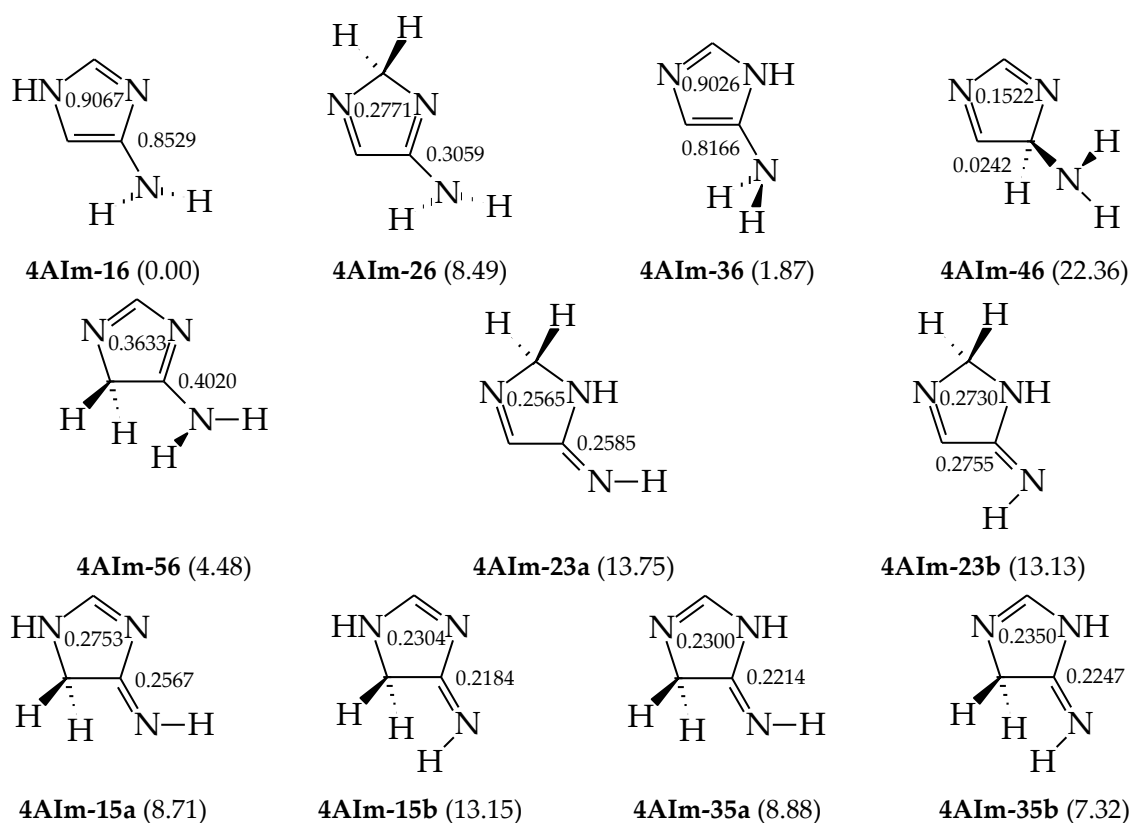

**Figure S2.** Structures for tautomers-rotamers of 4-amino-imidazole (**4AIm**), their HOMEDs and  $\Delta G$ s estimated at the DFT(B3LYP)/6-311+G(d,p) level. HOMED5s included in the ring, and HOMED6s placed near formula.  $\Delta G$ s (in kcal mol<sup>-1</sup>) given in parentheses after isomer abbreviation.

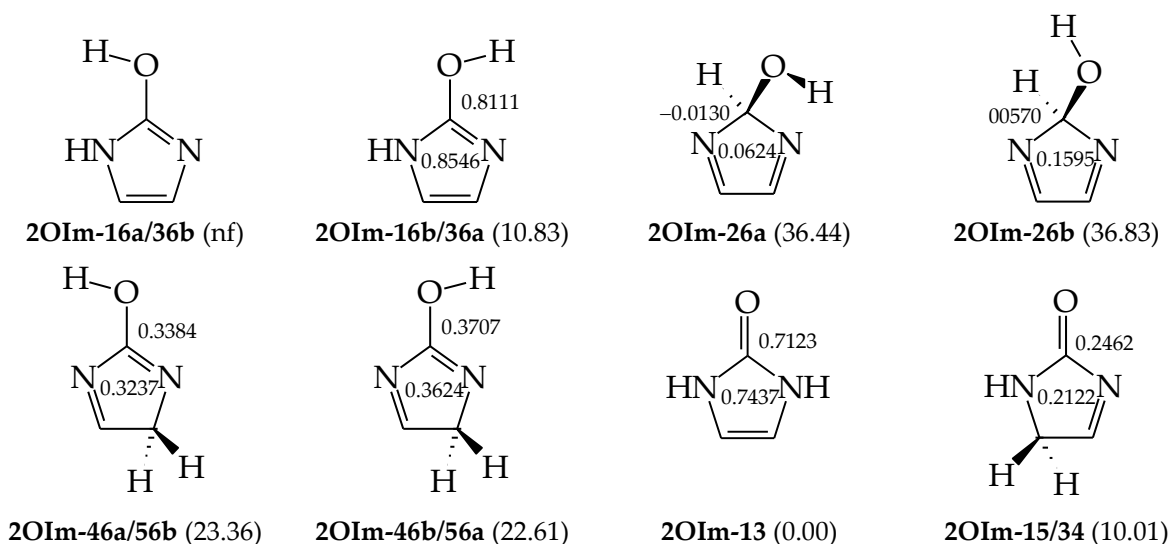

**Figure S3.** Structures for tautomers-rotamers of 2-hydroxy-imidazole (**2OIm**), their HOMEDs and  $\Delta G$ s estimated at the DFT(B3LYP)/6-311+G(d,p) level (nf – structure not found). HOMED5s included in the ring, and HOMED6s placed near formula.  $\Delta G$ s (in kcal mol<sup>-1</sup>) given in parentheses after isomer abbreviation.

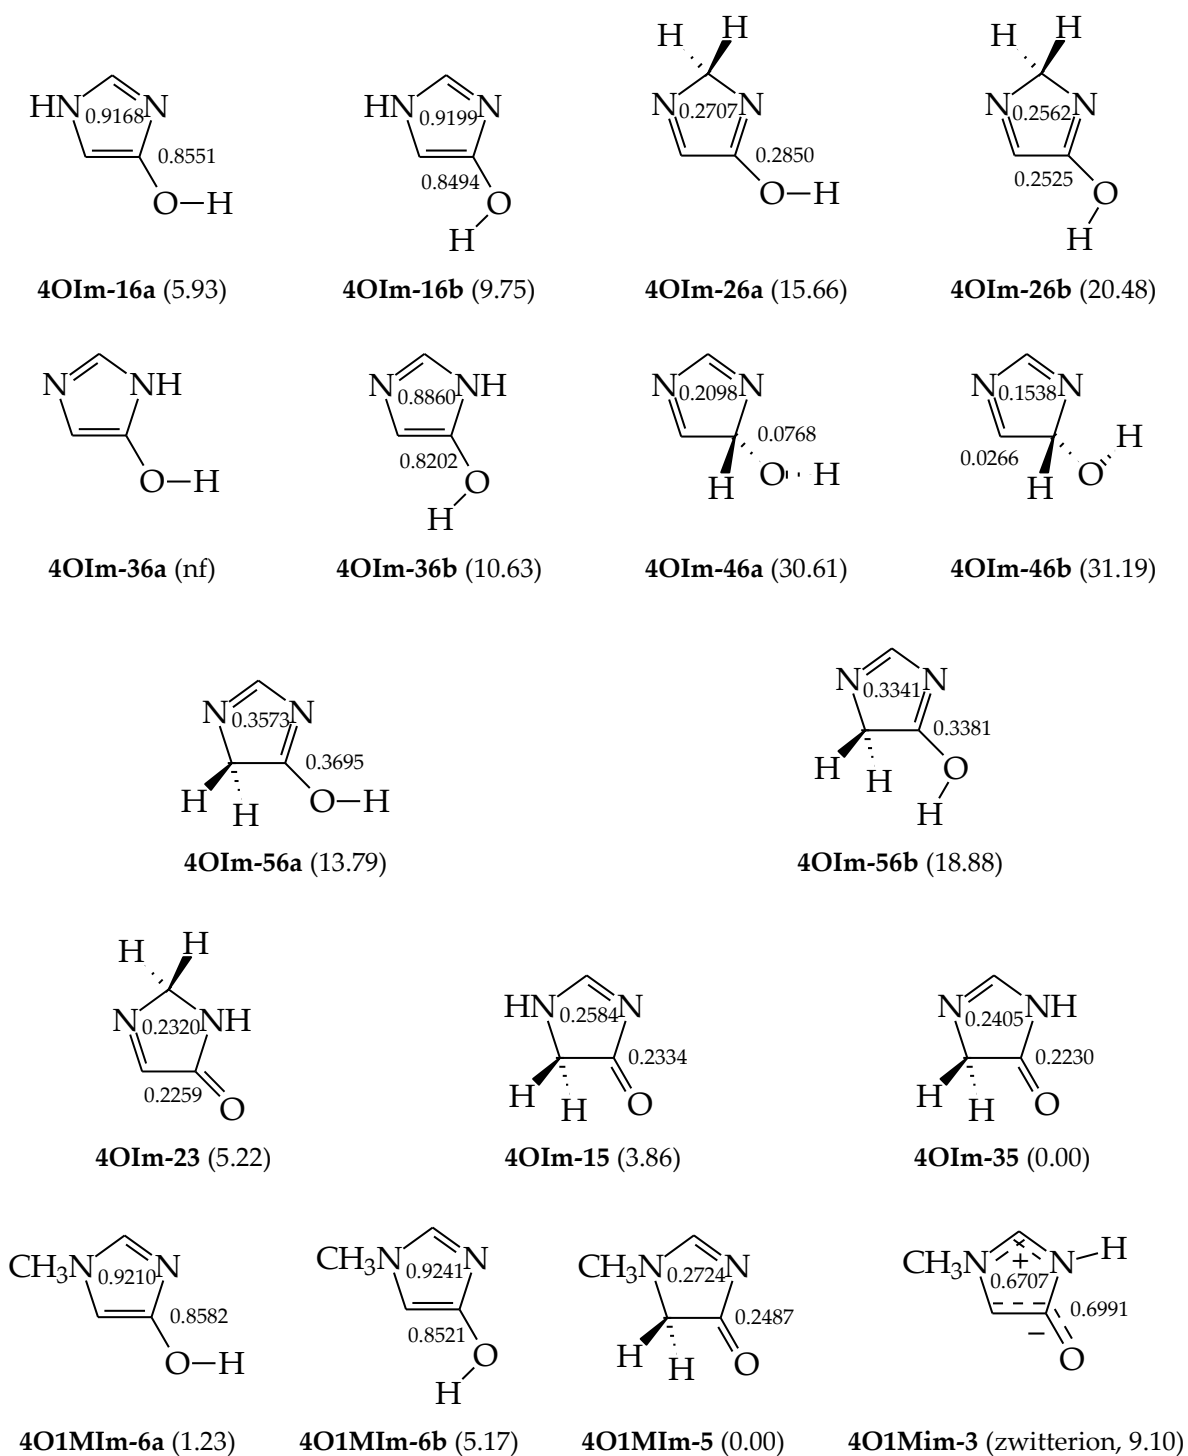

**Figure S4.** Structures for tautomers-rotamers of 4-hydroxy-imidazole (**4OIm**) and its 1-methyl derivative (**4O1MIm**), their HOMEDs and  $\Delta G$ s (in kcal mol<sup>-1</sup>) estimated at the DFT(B3LYP)/6-311+G(d,p) level (nf – structure not found). HOMED5s included in the ring. HOMED6s for isomers of **4OIm** and **4O1MIm** placed near formula.  $\Delta G$ s (in kcal mol<sup>-1</sup>) given in parentheses after isomer abbreviation.

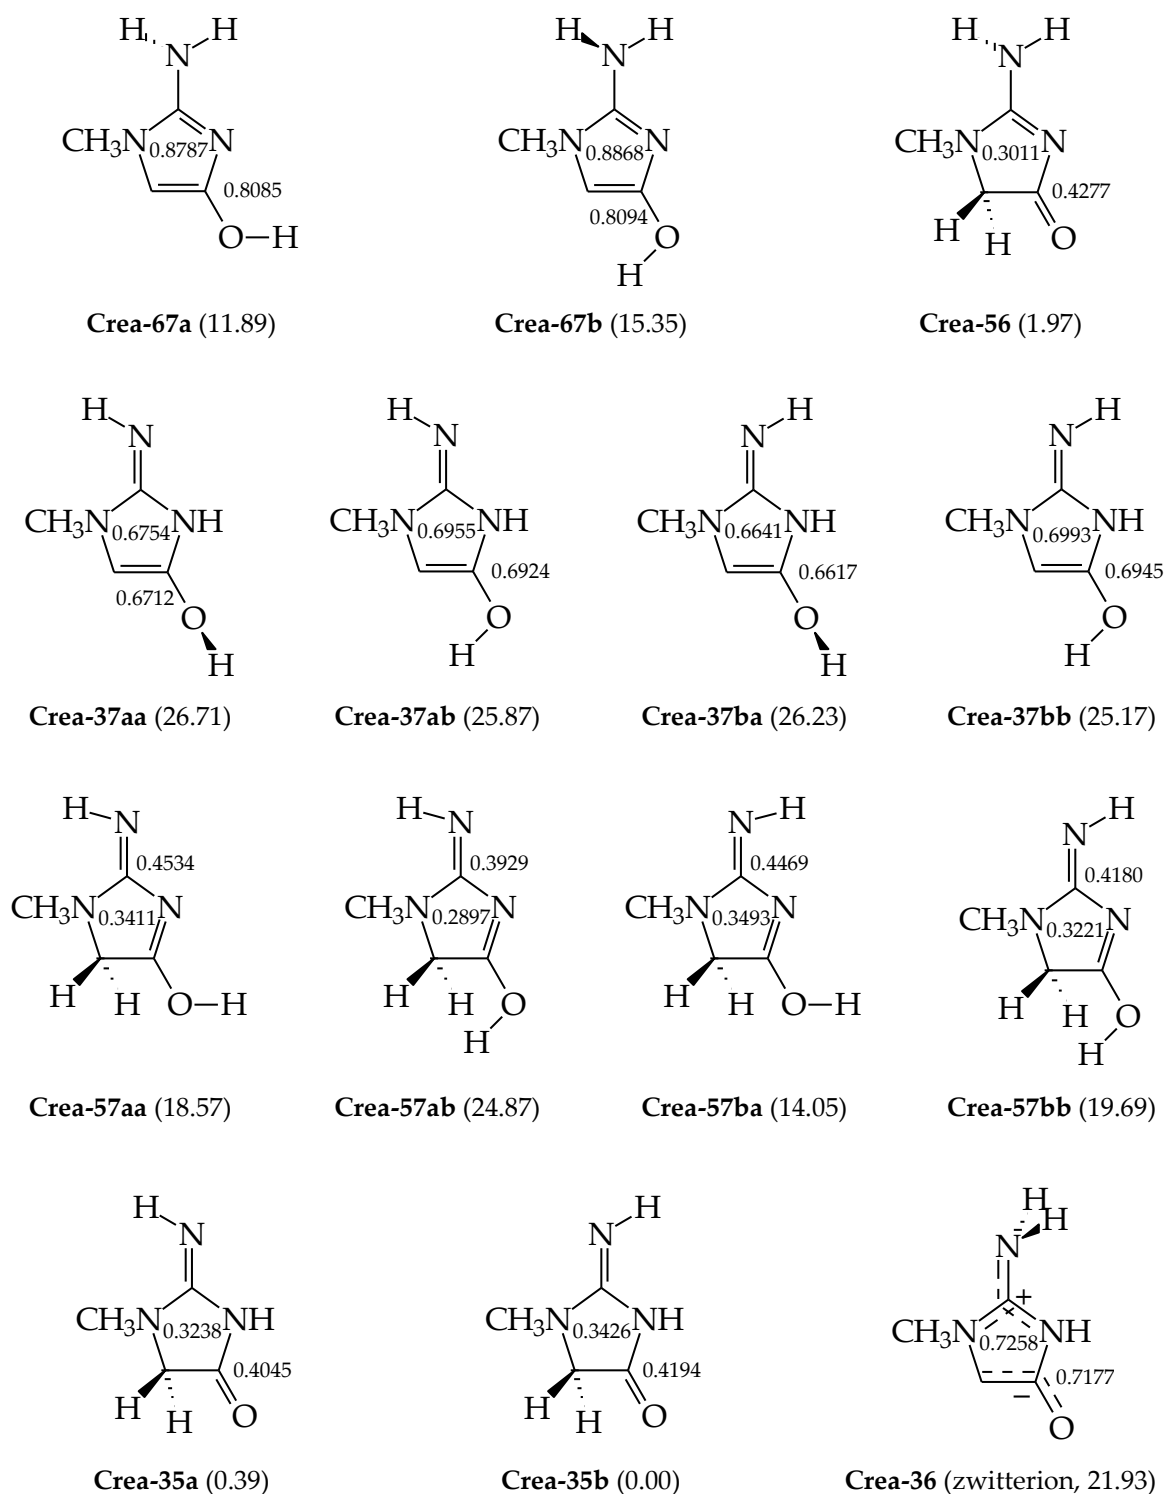

**Figure S5.** Structures for isomers of creatinine (Crea), their HOMEDs and  $\Delta G$ s estimated for at the DFT(B3LYP)/6-311+G(d,p) level. HOMED5s included in the ring, and HOMED7s placed near formula.  $\Delta G$ s (in kcal mol<sup>-1</sup>) given in parentheses after isomer abbreviation.

(a) **2AIm** vs **2OIm**

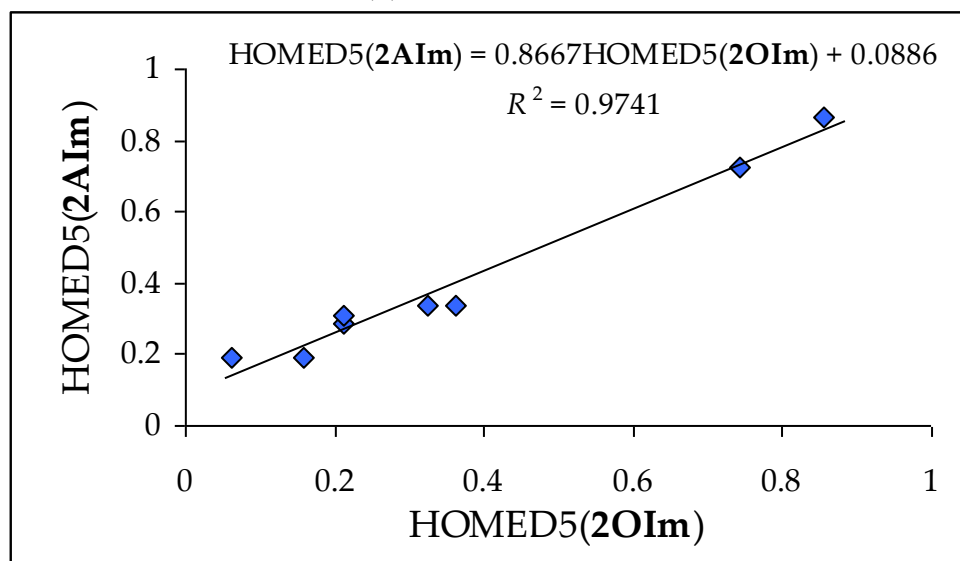

(b) **4AIm** vs **4OIm**

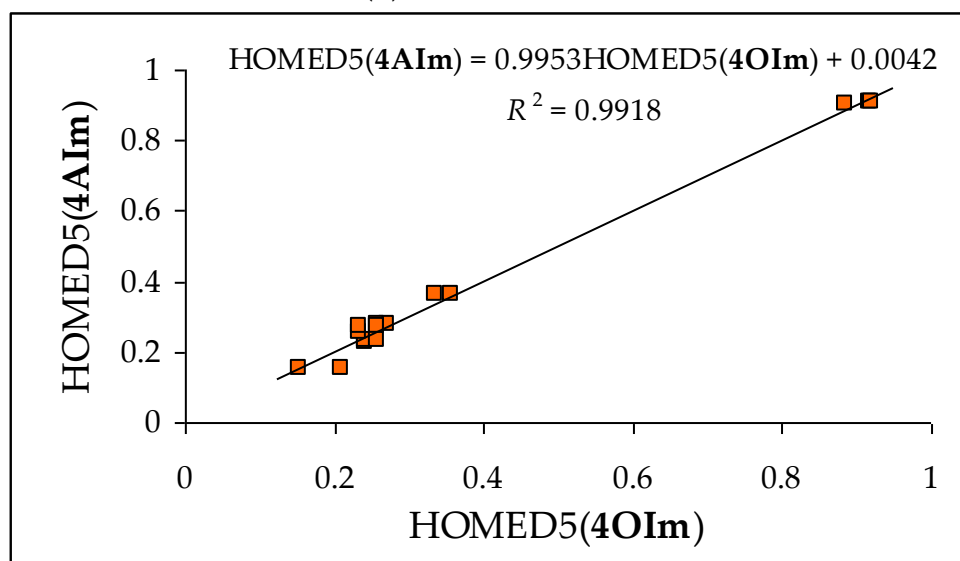

**Figure S6.** Linear trends between HOMED5s estimated for tautomers-rotamers of mono-amino and mono-hydroxy imidazoles: (a) **2AIm** vs **2OIm**, and (b) **4AIm** vs **4OIm**). HOMED5s refer to electron delocalization in the five-membered ring.

(a) **2AIm** vs **2OIm**

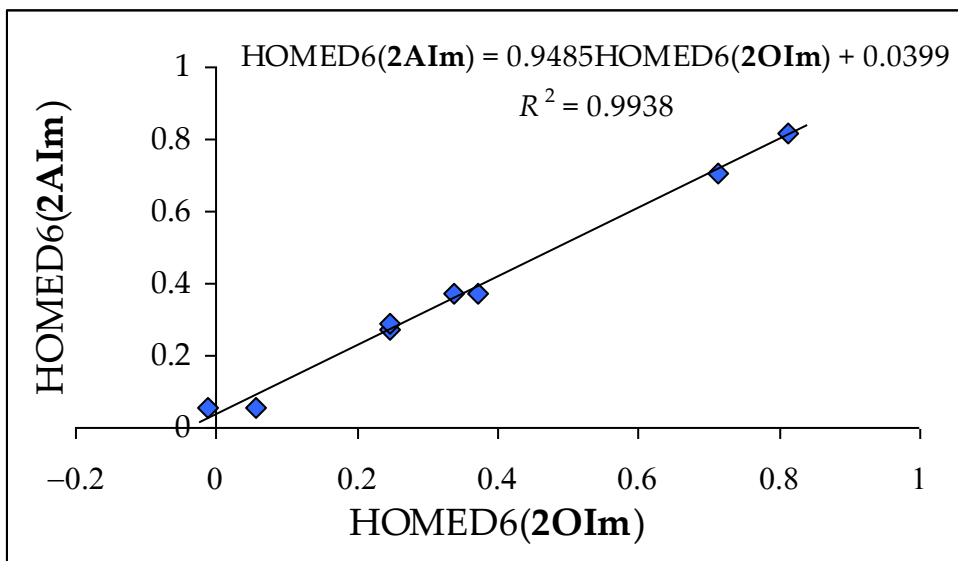

(b) **4AIm** vs **4OIm**

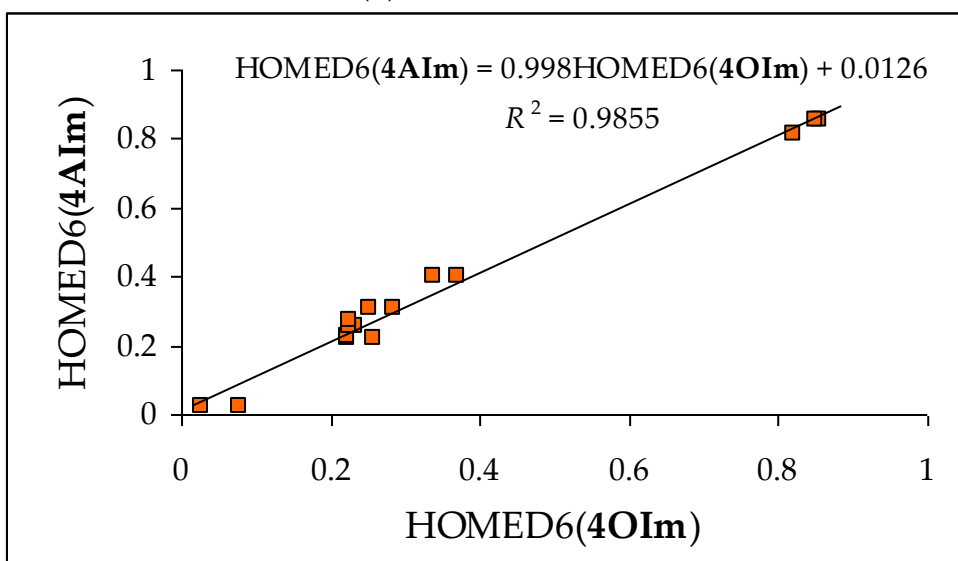

**Figure S7.** Linear trends between HOMED6s estimated for tautomers-rotamers of mono-amino and mono-hydroxy imidazoles: (a) **2AIm** vs **2OIm**, and (b) **4AIm** vs **4OIm**. HOMED6 refer to electron delocalization in the entire isomer-molecule.

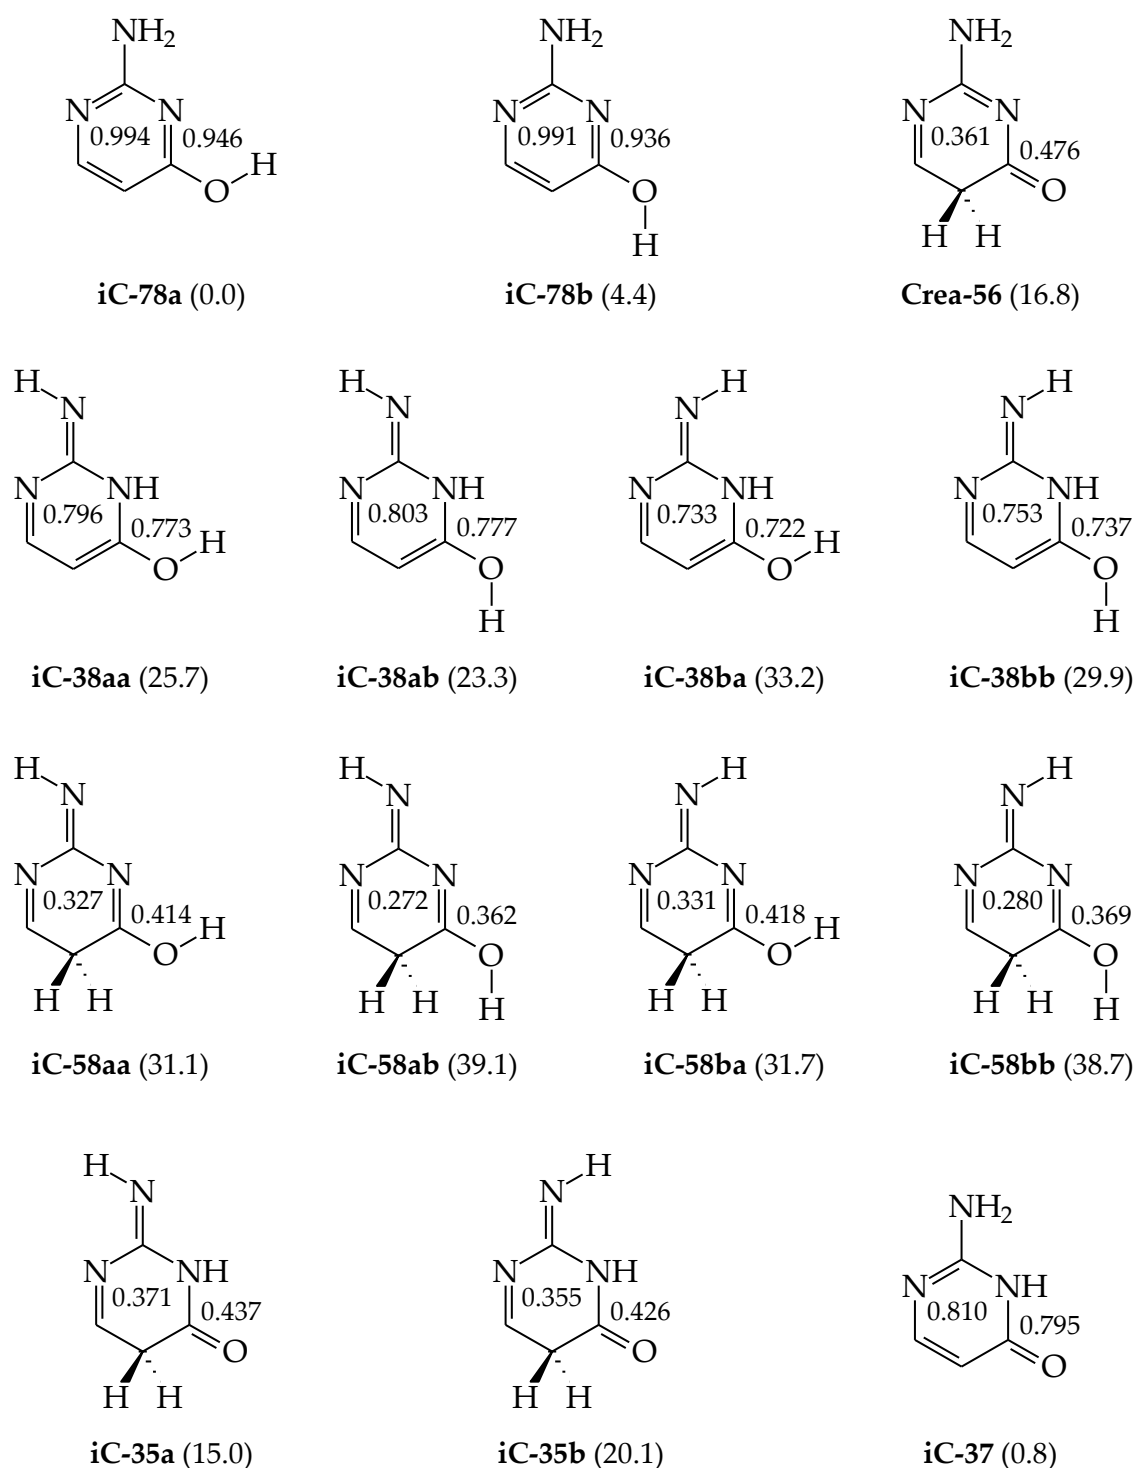

**Figure S8.** Structures for selected isomers of isocytosine (**iC**), analogous to those of creatinine given in Fig. S5, their HOMEDs and  $\Delta G$ s estimated at the DFT(B3LYP)/6-311+G(d,p) level. HOMED6s included in the ring, and HOMED8s placed near formula.  $\Delta G$ s (in kcal mol<sup>-1</sup>) given in parentheses after isomer abbreviation. Data taken from refs [33,34].



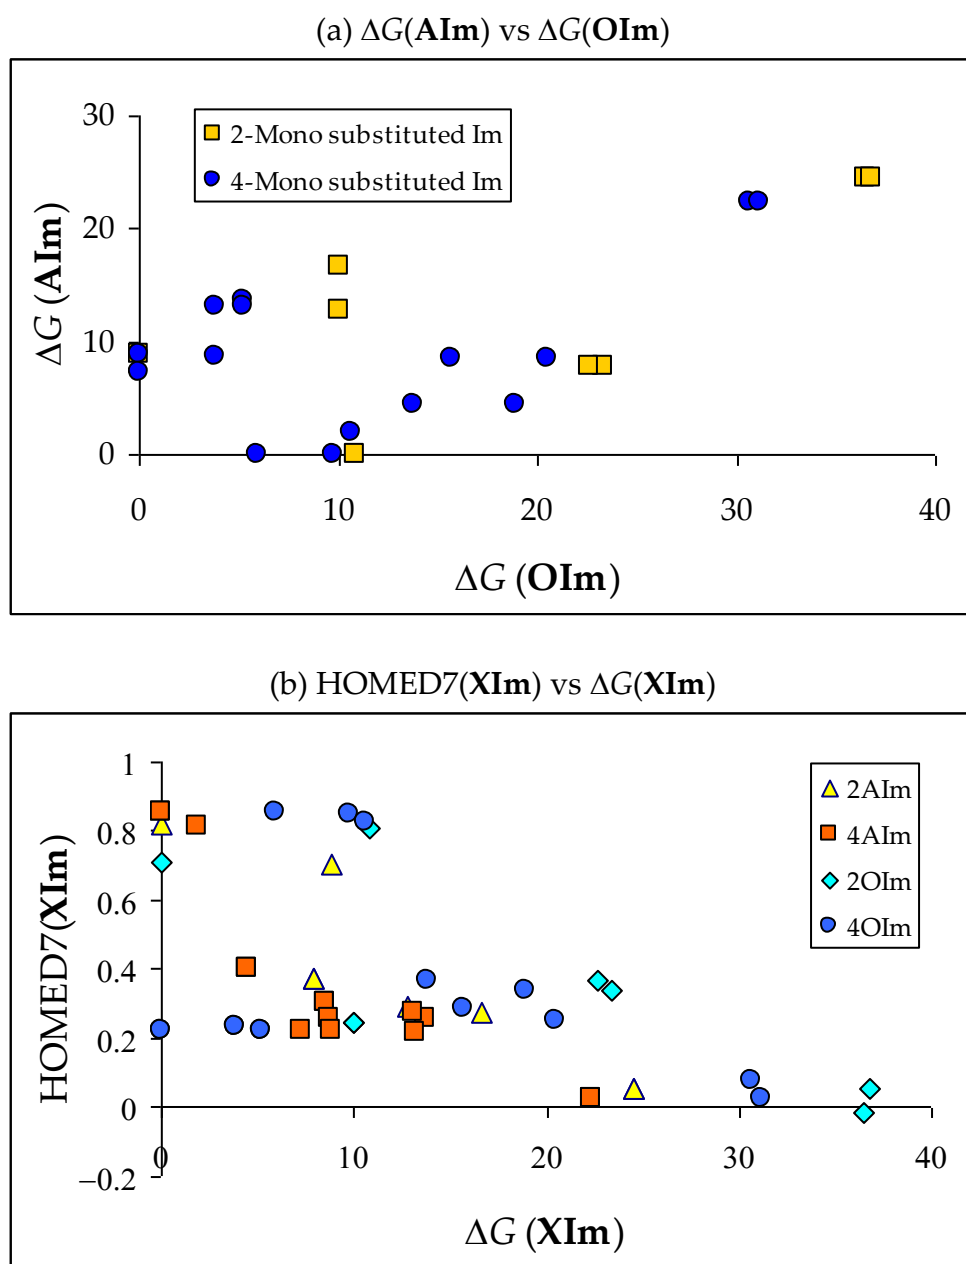

**Figure S9.** Scatter plots (a) between  $\Delta G$ s (in kcal mol<sup>-1</sup>) for isomers of mono-amino (**AIm**) and mono-hydroxy imidazoles (**OIm**), and also (b) between HOMEDs and  $\Delta G$ s for isomers of mono-substituted imidazoles (**2AIm**, **4AIm**, **2OIm**, and **4OIm**). Data taken from Figs S1-S4.

**Table S1.** Comparison of structural and thermochemical parameters estimated at the DFT-level for tautomers-rotamers of mono-substituted imidazoles in the gas phase.

| Isomer              | HOMED5 | HOMED6  | $\Delta(E + \text{ZPE})^a$ | $\Delta H^a$ | $T\Delta S^a$ | $\Delta G^a$ | $K$                | $x_i^b$            |
|---------------------|--------|---------|----------------------------|--------------|---------------|--------------|--------------------|--------------------|
| <b>2AIm-16/36</b>   | 0.8640 | 0.8187  | 0.00                       | 0.00         | 0.00          | 0.00         | 1.00               | <b>100</b>         |
| <b>2AIm-26</b>      | 0.1918 | 0.0552  | 24.59                      | 24.49        | -0.08         | 24.57        | $1 \cdot 10^{-20}$ | $1 \cdot 10^{-18}$ |
| <b>2AIm-46/56</b>   | 0.3395 | 0.3725  | 7.83                       | 7.78         | -0.12         | 7.89         | $2 \cdot 10^{-6}$  | $2 \cdot 10^{-4}$  |
| <b>2AIm-13</b>      | 0.7255 | 0.7065  | 9.12                       | 9.30         | 0.43          | 8.87         | $3 \cdot 10^{-7}$  | $3 \cdot 10^{-5}$  |
| <b>2AIm-15a/34b</b> | 0.2878 | 0.2737  | 16.66                      | 16.53        | -0.14         | 16.67        | $6 \cdot 10^{-13}$ | $6 \cdot 10^{-11}$ |
| <b>2AIm-15b/34a</b> | 0.3085 | 0.2914  | 12.78                      | 12.66        | -0.08         | 12.74        | $5 \cdot 10^{-10}$ | $5 \cdot 10^{-8}$  |
| <b>4AIm-16</b>      | 0.9067 | 0.8529  | 0.00                       | 0.00         | 0.00          | 0.00         | 1.0                | <b>95.84</b>       |
| <b>4AIm-26</b>      | 0.2771 | 0.3059  | 8.41                       | 8.30         | -0.19         | 8.49         | $6 \cdot 10^{-7}$  | $6 \cdot 10^{-5}$  |
| <b>4AIm-36</b>      | 0.9026 | 0.8166  | 2.52                       | 2.63         | 0.76          | 1.87         | 0.04               | <b>4.10</b>        |
| <b>4AIm-46</b>      | 0.1522 | 0.0242  | 22.36                      | 22.23        | -0.13         | 22.36        | $4 \cdot 10^{-17}$ | $4 \cdot 10^{-15}$ |
| <b>4AIm-56</b>      | 0.3633 | 0.4020  | 4.72                       | 4.83         | 0.35          | 4.48         | $5 \cdot 10^{-4}$  | <b>0.05</b>        |
| <b>4AIm-23a</b>     | 0.2565 | 0.2585  | 13.87                      | 13.81        | 0.05          | 13.75        | $8 \cdot 10^{-11}$ | $8 \cdot 10^{-9}$  |
| <b>4AIm-23b</b>     | 0.2730 | 0.2755  | 13.47                      | 13.47        | 0.34          | 13.13        | $2 \cdot 10^{-10}$ | $2 \cdot 10^{-8}$  |
| <b>4AIm-15a</b>     | 0.2753 | 0.2567  | 8.81                       | 8.73         | 0.01          | 8.71         | $4 \cdot 10^{-7}$  | $4 \cdot 10^{-5}$  |
| <b>4AIm-15b</b>     | 0.2304 | 0.2184  | 13.18                      | 13.04        | -0.11         | 13.15        | $2 \cdot 10^{-10}$ | $2 \cdot 10^{-8}$  |
| <b>4AIm-35a</b>     | 0.2300 | 0.2214  | 9.02                       | 8.95         | 0.08          | 8.88         | $3 \cdot 10^{-7}$  | $3 \cdot 10^{-5}$  |
| <b>4AIm-35b</b>     | 0.2350 | 0.2247  | 7.41                       | 7.29         | -0.04         | 7.32         | $4 \cdot 10^{-6}$  | $4 \cdot 10^{-4}$  |
| <b>2OIm-16a/36b</b> | c      | c       | c                          | c            | c             | c            | c                  | c                  |
| <b>2OIm-16b/36a</b> | 0.8546 | 0.8111  | 10.75                      | 10.70        | -0.12         | 10.83        | $1 \cdot 10^{-8}$  | $1 \cdot 10^{-6}$  |
| <b>2OIm-26a</b>     | 0.0624 | -0.0130 | 36.56                      | 36.57        | 0.13          | 36.44        | $2 \cdot 10^{-27}$ | $2 \cdot 10^{-25}$ |
| <b>2OIm-26b</b>     | 0.1595 | 0.0570  | 39.94                      | 36.94        | 0.12          | 36.83        | $1 \cdot 10^{-27}$ | $1 \cdot 10^{-25}$ |
| <b>2OIm-46a/56b</b> | 0.3237 | 0.3384  | 23.29                      | 23.17        | -0.19         | 23.36        | $8 \cdot 10^{-18}$ | $8 \cdot 10^{-16}$ |
| <b>2OIm-46b/56a</b> | 0.3624 | 0.3707  | 22.51                      | 23.35        | -0.26         | 22.61        | $3 \cdot 10^{-17}$ | $3 \cdot 10^{-15}$ |
| <b>2OIm-13</b>      | 0.7437 | 0.7123  | 0.00                       | 0.00         | 0.00          | 0.00         | 1.00               | <b>100</b>         |
| <b>2OIm-15/34</b>   | 0.2122 | 0.2462  | 10.39                      | 10.45        | 0.45          | 10.01        | $5 \cdot 10^{-8}$  | $5 \cdot 10^{-6}$  |
| <b>4OIm-16a</b>     | 0.9168 | 0.8551  | 5.80                       | 5.84         | -0.08         | 5.93         | $4 \cdot 10^{-5}$  | $4 \cdot 10^{-3}$  |
| <b>4OIm-16b</b>     | 0.9199 | 0.8494  | 9.74                       | 9.89         | 0.13          | 9.75         | $7 \cdot 10^{-8}$  | $7 \cdot 10^{-6}$  |
| <b>4OIm-26a</b>     | 0.2707 | 0.2850  | 15.50                      | 15.41        | -0.25         | 15.66        | $3 \cdot 10^{-12}$ | $3 \cdot 10^{-10}$ |
| <b>4OIm-26b</b>     | 0.2562 | 0.2525  | 20.42                      | 20.44        | -0.05         | 20.48        | $1 \cdot 10^{-15}$ | $1 \cdot 10^{-13}$ |
| <b>4OIm-36a</b>     | c      | c       | c                          | c            | c             | c            | c                  | c                  |
| <b>4AOm-36b</b>     | 0.8860 | 0.8202  | 10.74                      | 10.94        | 0.31          | 10.63        | $2 \cdot 10^{-8}$  | $2 \cdot 10^{-6}$  |
| <b>4OIm-46a</b>     | 0.2098 | 0.0768  | 30.70                      | 30.81        | 0.19          | 30.61        | $4 \cdot 10^{-23}$ | $4 \cdot 10^{-21}$ |
| <b>4OIm-46b</b>     | 0.1538 | 0.0266  | 31.30                      | 31.42        | 0.23          | 31.19        | $1 \cdot 10^{-23}$ | $1 \cdot 10^{-21}$ |
| <b>4OIm-56a</b>     | 0.3573 | 0.3695  | 13.64                      | 13.56        | -0.23         | 13.79        | $8 \cdot 10^{-11}$ | $8 \cdot 10^{-9}$  |
| <b>4OIm-56b</b>     | 0.3341 | 0.3381  | 18.80                      | 18.80        | -0.08         | 18.88        | $1 \cdot 10^{-14}$ | $1 \cdot 10^{-12}$ |
| <b>4OIm-23</b>      | 0.2320 | 0.2259  | 5.28                       | 5.33         | 0.11          | 5.22         | $1 \cdot 10^{-4}$  | <b>0.01</b>        |
| <b>4OIm-15</b>      | 0.2584 | 0.2334  | 4.55                       | 4.84         | 0.98          | 3.86         | 0.01 <sub>5</sub>  | <b>0.15</b>        |
| <b>4OIm-35</b>      | 0.2405 | 0.2230  | 0.00                       | 0.00         | 0.00          | 0.00         | 1.00               | <b>99.84</b>       |

<sup>a</sup> In kcal mol<sup>-1</sup>. <sup>b</sup> Percentage contents. <sup>c</sup> Not Found.

**Table S2.** Comparison of structural and thermochemical parameters estimated at the DFT-level for isomers of 1-methyl-imidazoles in the gas phase.

| Isomer                          | HOMED5 | HOMED6 | $\Delta(E + \text{ZPE})^a$ | $\Delta H^a$ | $T\Delta S^a$ | $\Delta G^a$ | $K$                | $x_i^b$            |
|---------------------------------|--------|--------|----------------------------|--------------|---------------|--------------|--------------------|--------------------|
| <b>2A1MIm-6</b>                 | 0.8742 | 0.8198 | 0.00                       | 0.00         | 0.00          | 0.00         | 1.00               | <b>100</b>         |
| <b>2A1MIm-3a</b>                | 0.7327 | 0.7166 | 8.77                       | 8.92         | 0.57          | 8.35         | $8 \cdot 10^{-7}$  | $8 \cdot 10^{-5}$  |
| <b>2A1MIm-3b</b>                | 0.7303 | 0.7156 | 8.34                       | 8.55         | 0.77          | 7.78         | $2 \cdot 10^{-6}$  | $2 \cdot 10^{-4}$  |
| <b>2A1MIm-5a</b>                | 0.3129 | 0.3021 | 16.95                      | 16.84        | -0.04         | 16.88        | $4 \cdot 10^{-13}$ | $4 \cdot 10^{-11}$ |
| <b>2A1MIm-5b</b>                | 0.3342 | 0.3219 | 12.21                      | 12.14        | 0.15          | 11.99        | $2 \cdot 10^{-9}$  | $2 \cdot 10^{-7}$  |
| <b>4O1MIm-6a</b>                | 0.9210 | 0.8582 | 0.92                       | 0.93         | -0.31         | 1.23         | $0.12_{4795}$      | <b>11.09</b>       |
| <b>4O1MIm-6b</b>                | 0.9241 | 0.8521 | 4.96                       | 5.05         | -0.12         | 5.17         | $2 \cdot 10^{-4}$  | <b>0.02</b>        |
| <b>4O1MIm-5</b>                 | 0.2724 | 0.2487 | 0.00                       | 0.00         | 0.00          | 0.00         | 1.00               | <b>88.89</b>       |
| <b>4O1MIm-3</b><br>(zwitterion) | 0.6707 | 0.6991 | 10.30                      | 8.70         | -0.39         | 9.10         | $2 \cdot 10^{-7}$  | $2 \cdot 10^{-5}$  |

<sup>a</sup> In kcal mol<sup>-1</sup>. <sup>b</sup> Percentage contents.

**Table S3.** Comparison of structural and thermochemical parameters estimated at the DFT-level for isomers of creatinine in the gas phase.

| Isomer                         | HOMED5 | HOMED7 | $\Delta(E + \text{ZPE})^a$ | $\Delta H^a$ | $T\Delta S^a$ | $\Delta G^a$ | $K$                | $x_i^b$            |
|--------------------------------|--------|--------|----------------------------|--------------|---------------|--------------|--------------------|--------------------|
| <b>Crea-67a</b>                | 0.8787 | 0.8085 | 11.70                      | 11.90        | 0.01          | 11.89        | $2 \cdot 10^{-9}$  | $1 \cdot 10^{-7}$  |
| <b>Crea-67b</b>                | 0.8868 | 0.8094 | 15.25                      | 15.52        | 0.16          | 15.35        | $6 \cdot 10^{-12}$ | $4 \cdot 10^{-10}$ |
| <b>Crea-56</b>                 | 0.3011 | 0.4277 | 1.77                       | 1.79         | -0.17         | 1.97         | $0.03_{6222}$      | <b>2.33</b>        |
| <b>Crea-37aa</b>               | 0.6754 | 0.6712 | 26.72                      | 26.99        | 0.28          | 26.71        | $3 \cdot 10^{-20}$ | $2 \cdot 10^{-18}$ |
| <b>Crea-37ab</b>               | 0.6955 | 0.6924 | 26.06                      | 26.45        | 0.58          | 25.87        | $1 \cdot 10^{-19}$ | $7 \cdot 10^{-18}$ |
| <b>Crea-37ba</b>               | 0.6641 | 0.6617 | 26.36                      | 26.65        | 0.42          | 26.23        | $6 \cdot 10^{-20}$ | $3 \cdot 10^{-18}$ |
| <b>Crea-37bb</b>               | 0.6993 | 0.6945 | 25.63                      | 26.12        | 0.95          | 25.17        | $4 \cdot 10^{-19}$ | $2 \cdot 10^{-17}$ |
| <b>Crea-57aa</b>               | 0.3411 | 0.4534 | 18.24                      | 18.10        | -0.47         | 18.57        | $2 \cdot 10^{-14}$ | $2 \cdot 10^{-12}$ |
| <b>Crea-57ab</b>               | 0.2897 | 0.3929 | 24.58                      | 24.53        | -0.34         | 24.87        | $6 \cdot 10^{-19}$ | $4 \cdot 10^{-17}$ |
| <b>Crea-57ba</b>               | 0.3493 | 0.4469 | 13.79                      | 13.68        | -0.37         | 14.05        | $5 \cdot 10^{-11}$ | $3 \cdot 10^{-9}$  |
| <b>Crea-57bb</b>               | 0.3221 | 0.4180 | 19.43                      | 19.40        | -0.29         | 19.69        | $4 \cdot 10^{-15}$ | $2 \cdot 10^{-13}$ |
| <b>Crea-35a</b>                | 0.3238 | 0.4045 | 0.21                       | 0.13         | -0.26         | 0.39         | $0.51_{6953}$      | <b>33.3</b>        |
| <b>Crea-35b</b>                | 0.3426 | 0.4194 | 0.00                       | 0.00         | 0.00          | 0.00         | 1.00               | <b>64.4</b>        |
| <b>Crea-36</b><br>(zwitterion) | 0.7258 | 0.7177 | 21.87                      | 22.10        | 0.17          | 21.93        | $8 \cdot 10^{-17}$ | $5 \cdot 10^{-15}$ |

<sup>a</sup> In kcal mol<sup>-1</sup>. <sup>b</sup> Percentage contents.

**Table S4.** Comparison of relative energetic parameters (in kcal mol<sup>-1</sup>) for creatinine isomers calculated in this work at DFT level with the literature data.

| Isomer                  | B3LYP(1) <sup>a</sup> |            | B2 <sup>b</sup> | B3LYP(2) <sup>c</sup> |            | MP2 <sup>c</sup> |            | M062X <sup>c</sup> |            |
|-------------------------|-----------------------|------------|-----------------|-----------------------|------------|------------------|------------|--------------------|------------|
|                         | $\Delta E$            | $\Delta G$ | $\Delta E$      | $\Delta E$            | $\Delta G$ | $\Delta E$       | $\Delta G$ | $\Delta E$         | $\Delta G$ |
| Crea-67a                | 11.7                  | 11.9       | 10.8            | 11.0                  | 10.8       | 7.0              | 5.9        | 8.5                | 7.8        |
| Crea-67b                | 15.2                  | 15.4       | 14.2            | 14.1                  | 13.8       | 10.6             | 9.4        | 12.4               | 11.9       |
| Crea-56                 | 1.8                   | 2.0        | 1.8             | 1.5                   | 1.4        | 1.6              | 1.7        | 1.7                | 1.6        |
| Crea-37aa               | 26.7                  | 26.7       | 27.0            | 24.4                  | 24.3       | 25.0             | 24.8       | 24.3               | 23.9       |
| Crea-37ab               | 26.1                  | 25.9       | 26.3            | 23.9                  | 23.1       | 24.6             | 24.5       | 23.8               | 23.0       |
| Crea-37ba               | 26.4                  | 26.2       | 26.8            | d                     | d          | d                | d          | d                  | d          |
| Crea-37bb               | 25.6                  | 25.2       | 26.2            | d                     | d          | d                | d          | d                  | d          |
| Crea-57aa               | 18.2                  | 18.6       | 17.4            | 17.2                  | 17.4       | 15.9             | 16.3       | 16.5               | 16.8       |
| Crea-57ab               | 24.6                  | 24.9       | 23.4            | 22.5                  | 22.7       | 22.1             | 22.2       | 22.6               | 22.7       |
| Crea-57ba               | 13.8                  | 14.0       | 13.3            | d                     | d          | d                | d          | d                  | d          |
| Crea-57bb               | 19.4                  | 19.7       | 18.7            | d                     | d          | d                | d          | d                  | d          |
| Crea-35a                | 0.2                   | 0.4        | 0.0             | 0.0                   | 0.0        | 0.0              | 0.0        | 0.0                | 0.0        |
| Crea-35b                | 0.0                   | 0.0        | 0.1             | d                     | d          | d                | d          | d                  | d          |
| Crea-36<br>(zwitterion) | 21.9                  | 21.9       | d               | 21.3                  | 20.6       | 19.5             | 17.5       | 22.9               | 22.7       |

<sup>a</sup> This work, B3LYP(1): B3LYP/6-311+G(d,p). <sup>b</sup> B2: B2PLYP-D3/maug-cc-pVTZ-dH, data from ref. [14],

<sup>c</sup> B3LYP(2): B3LYP/6-311++G(3df, 3pd), data from ref. [13]. <sup>d</sup> MP2/6-311++G(d, p), data from ref. [13].

<sup>e</sup> M062X/6-311++G(d, p), data from ref. [13]. <sup>d</sup> Lack of data.

**Table S5.** Comparison of thermochemical parameters estimated in this work at the DFT, G2 and G2(MP2) levels of theory for selected isomers of 4-hydroxy-imidazole in the gas phase.

| Isomer   | Method           | $\Delta E^a$ | $\Delta H^a$ | $T\Delta S^a$ | $\Delta G^a$ | $K$                   | $x_i^b$            |
|----------|------------------|--------------|--------------|---------------|--------------|-----------------------|--------------------|
| 4OIm-16a | DFT <sup>c</sup> | 5.80         | 5.84         | -0.08         | 5.93         | 4.52·10 <sup>-5</sup> | 4·10 <sup>-3</sup> |
|          | G2               | 5.20         | 5.23         | -0.11         | 5.34         | 1.22·10 <sup>-4</sup> | 0.01               |
|          | G2(MP2)          | 4.92         | 4.96         | -0.11         | 5.07         | 1.92·10 <sup>-4</sup> | 0.02               |
| 4OIm-15  | DFT <sup>c</sup> | 4.55         | 4.84         | 0.98          | 3.86         | 0.01 <sub>5</sub>     | 0.15               |
|          | G2               | 5.28         | 5.36         | 0.14          | 5.22         | 1.50·10 <sup>-4</sup> | 0.02               |
|          | G2(MP2)          | 5.24         | 5.31         | 0.14          | 5.17         | 1.62·10 <sup>-4</sup> | 0.02               |
| 4OIm-35  | DFT <sup>c</sup> | 0.00         | 0.00         | 0.00          | 0.00         | 1.00                  | 99.84              |
|          | G2               | 0.00         | 0.00         | 0.00          | 0.00         | 1.00                  | 99.97              |
|          | G2(MP2)          | 0.00         | 0.00         | 0.00          | 0.00         | 1.00                  | 99.96              |

<sup>a</sup> In kcal mol<sup>-1</sup>. <sup>b</sup> Percentage contents. <sup>c</sup> DFT(B3LYP)/6-311+G(d,p).
